# Supplementary material
Source: PubMed Central journal article supplement (PMC6158087)
Supplement: NIHMS985508-supplement-supp.pdf [file NIHMS985508-supplement-supp.pdf]

Khalid, et al., Supplemental Figure 1

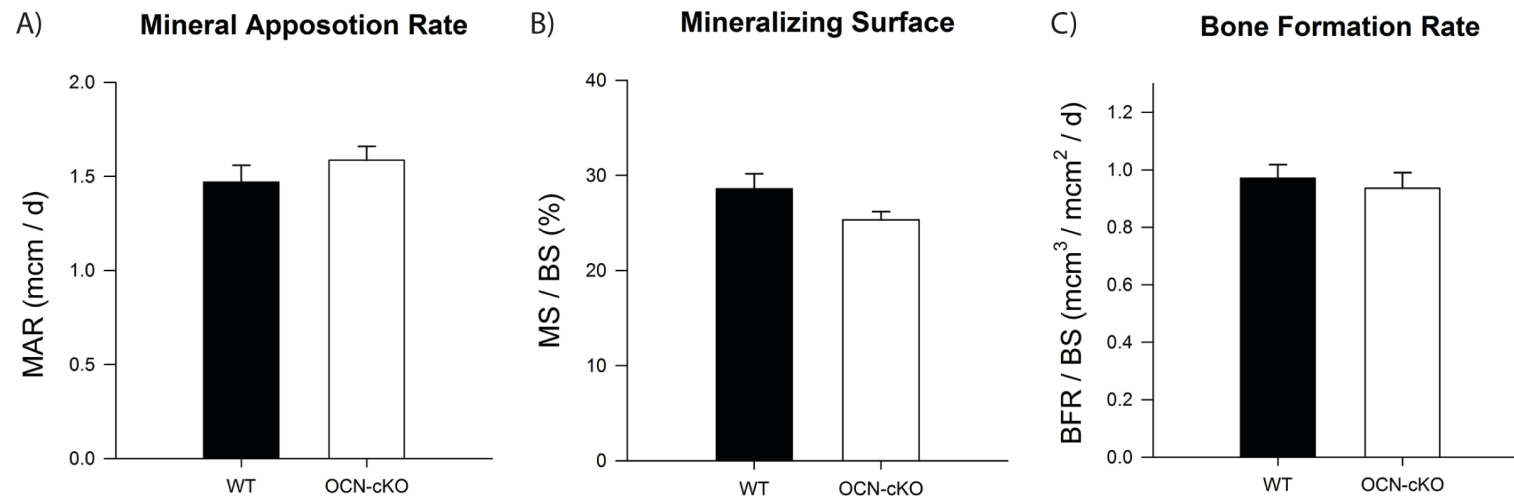

Khalid, et al., Supplemental Figure 2

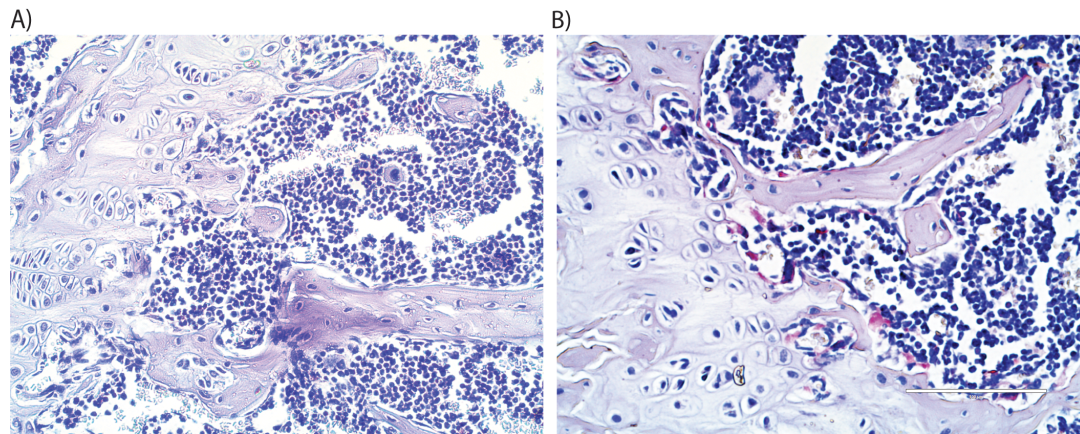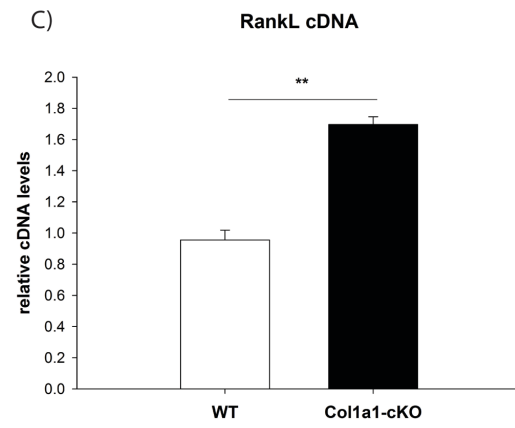

Khalid, et al., Supplemental Figure 3

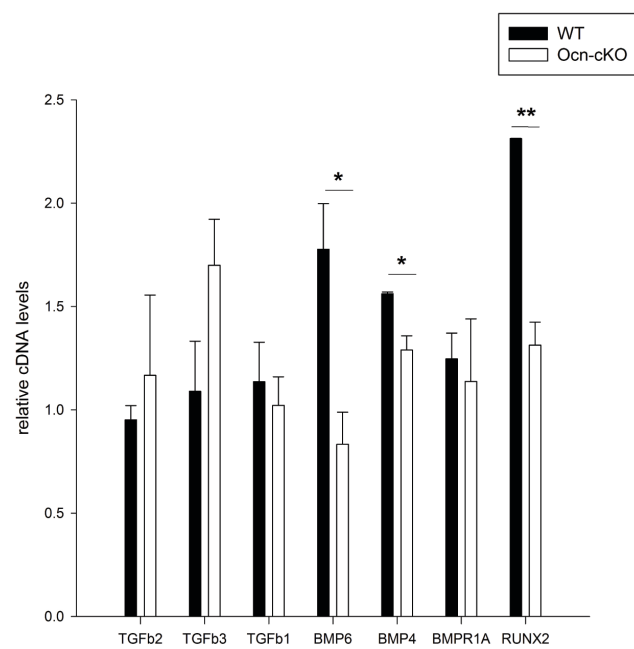

Khalid, et al., Supplemental Figure 4

A.

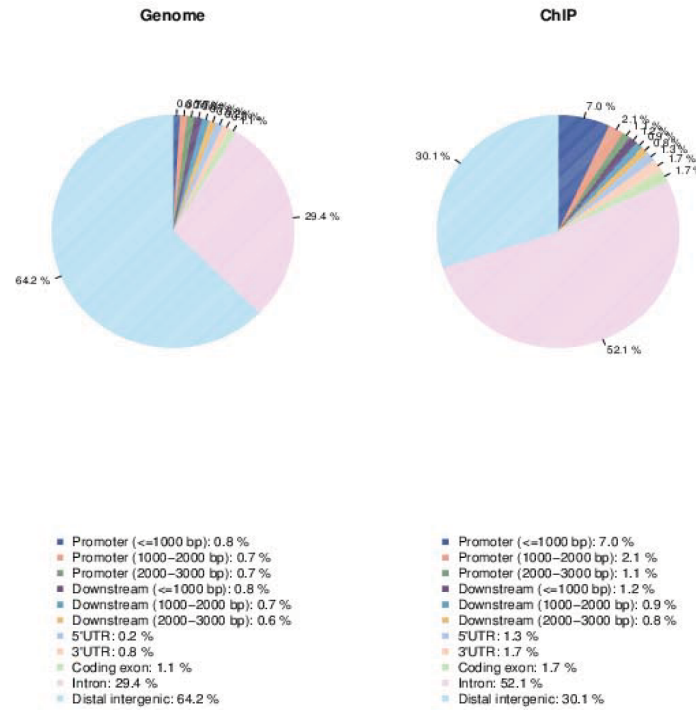

B.

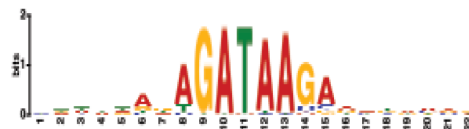

## Khalid, et al., Supplemental Figure 5

### GATA4 SITES IN RANKL ENHANCERS (SEE FIGURE 5)

**GATA4 SITES ARE IN RED**

100% MATCH USING PATCH ([HTTP://GENE-REGULATION.COM](http://gene-regulation.com))

#### REGION A

TCTGTCTCCTCTGTGTAATAAATATAAACAGTGCTCCAAAATAAAATAGCAAGTGAGAGCCAGCTTCTCTGAAT  
CAATTCAGTACTGGCCAGCATTGAGAGAACAAGGGTTAGAGGGGCTGTTGGCCAAACAGAACAACTAACTATTTC  
TCTTAAACAGAAGCATAG

#### REGION B

GGGGCCAGCCTAGAGAGCCAGAAACCAACCACTGGACCCAACCCACAGCCTCCACCTCAGAGGGCCCTGATGGGG  
AGGGAGGAGCGGGTCCCTGAGAGCGAAGAAGAGTGGGAGGGCGAAGGAAAGGAAGGAGGGCAGATGTGGGAGT  
GAAAGAGGCACCTCCTGGAGGCTGATTGGCTCTGGAGGCCAGCTCTCCACGAGTTTATAAGAGTTAGGGCTG  
CCTGGGGTACCC

#### REGION C

GGACCACTCAACTTACCCACAACCTGTGTCAAGAAGGTCACTTTCTCTGGACCTAGCTGAGCCCACATCTTTCAGG  
GTTCACTCCAATGGGACATGGCATGCCACCCCTATCTTCTGTTTATCTGGCTGAGTGTTCTCACCATAGACCTGT  
AGCCACAGTCATGGT

#### REGION D

GGTCAGAGCCTTAGCCACAGCTGGAAAACACAAGGTATCAGGTTCTCGGCTAAGCCCCCTTGGTGGGAGAGCTGG  
GAGCTTCTGACCTCCTT

#### REGION E

GAGCTGTGTCCTAGAAGAATTGTCCCAAGAGCCCATGAACAGGATAATGGTTTGCACCACCGCTTCTGAAAAGC  
AAATGGGATTTTGACATGAACCTCGGAAAGGGGTGAGACCACACTGACATATATTTTCTGGTTCTAATCTTACTTTCCG  
TACCACTGTGGACTGCATTCCATAACCCCTCTAACCTAGCGTCCAGCCATTCTACCGCTTTTATCAACTCCAGAATG  
GTCTCAGCACAGCATGTCTTGTCTGAGGGCAGGGGACCAGTGGGTGGCCAGACCTCAATCTCTGGCCAGCAACA  
CCCAGACTTCTACTCTGAAAAAGCATTATGACATCACCCGGGGCCAATCAAATCAGTCGTCTCGGATGGCTA  
TTCTAGATGATTTTGTCTATGATACTGTCTCGTAGCCTAAATAACTGACAATGTAATAAGTGACAAGTATCGTACTTC  
TCCATTTTTTAAATTTTTGTCATTTTAATTTGTTTACTATGTGCAGGG

#### REGION F

GTGCTGTGAAGCAAAAATCCTATAGCCTCTCCTGACCTGTGTGTTCCCGAAGGAAGCATAATGTCTGTATTTATTTT  
GAGATGAAATTTCTCATTACTGTGAGTGTGAGACTCAGTCATTCTGAGGTTCTTCGGAGACAATTCAGCTTTTGTTC  
CCAGATGAAAGATTTATTGATGGCCACACAGGGGAGAAAGCCAAAGGCAAAATGATACATGGATGTAATAAGACAAGGC  
CTGCACATCACTTCTGGTGTCTAGGGTCTCACTGCACTGTGTGCTGTGATACTGTGTTGTTGGTTCTGTTCTCCTCC  
TGGTCAATACAGCCTCGTTACTTCTGAGGCCATTCCAAAAGCAACAAGTGTCTCCAGGAGAACCCAGGGGCA  
GCTCAACTGAGTGACGGGACTTTGAGATCGTCTGAATGAGAACAAGTTTGAAGATAATGATGGGGTTGACATTTGT  
GTCACCTGGAACACTCACTGCTGACATACTTCCCTCACATTTGTAGTGC

#### REGION G

TGCTGTCTCCCGATGTTCTGTCACTGTCTCAGGGCTCAGACCAATGCATTCATCCAGTGGCCAGAAAGCAGC  
TTGCCAATGACTTGGCAGTACTCCCTGGGGCTGCACTATTCTGTTGGCAGTGGCCAGGATGCCAGGCATCAC  
CCTCCGTGTACAA

#### REGION H

GAGTTTGCAGGAGGTTGCTCAGGCTTCTTGTCTCGAGGAATACCATGAACAGTTCAGATAAGGGAGAGTCACC  
TGACTCCAGACACAGGATTCGAGCCCAGGGCCTGGATTGCAGCTACAGGGG

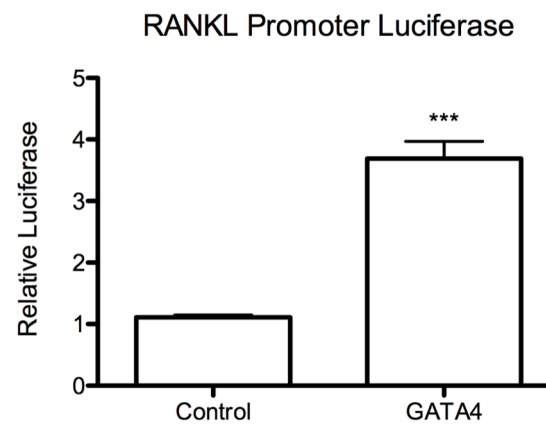

Khalid, et al., Supplemental Figure 7

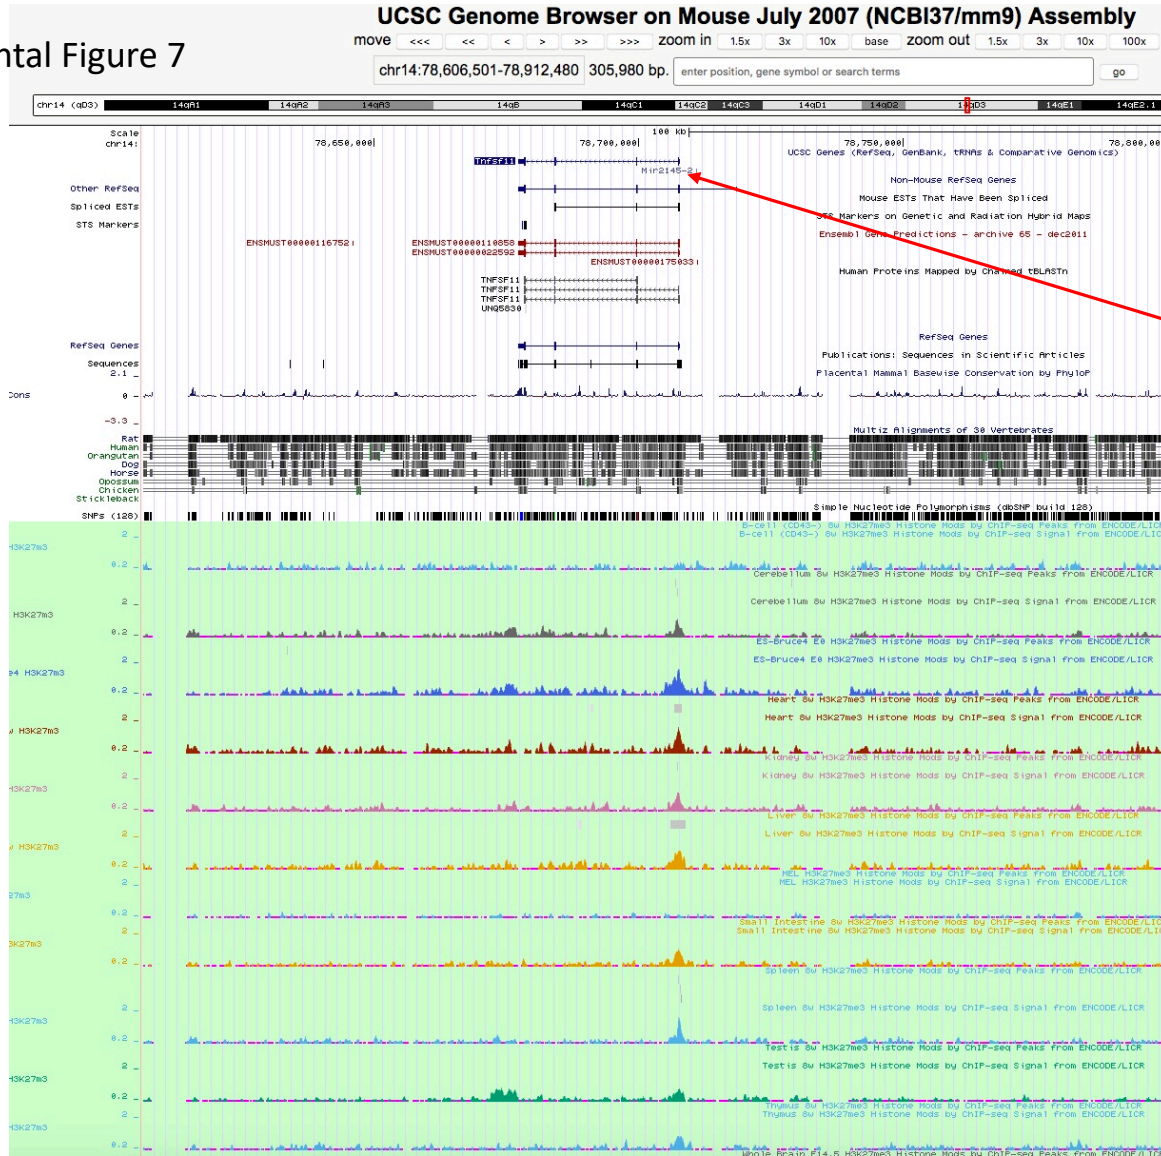

Khalid, et al., Supplemental Table 1

Mouse CHIP primers

| SEQUENCE | FORWARD PRIMER 5' TO 3' | REVERSE PRIMER 5' TO 3' |
|----------|-------------------------|-------------------------|
| IS7      | CTGAAGCCAAGAGGCAGATT    | CGCACATCCTTTCAGGTGCT    |
| IS8      | GTGGCTGCTCTTCGCTGCCA    | TGCTGCCACCTGGCCTTTGG    |
| RANKL A  | TAGCAAGTGAGAGCCAGCTT    | GCCCCCTAACCCCTTGTTT     |
| RANKL B  | GGGGCCAGCCTAGAGAGCCA    | GGGTACCCAGGCAGCCCTA     |
| RANKL C  | GACCTAGCTGAGCCCACATC    | AGGAAGATAGGGGGTGGCAT    |
| RANKL D  | GGTCAGAGCCTTAGCCACAG    | AAGGAGGTCAGAAGCTCCCA    |
| RANKL E  | GAGCTGTGTCTAGAAGAAT     | CCCTGCACATAGTAAACAAA    |
| RANKL F  | GTGCTGTGAAGCAAAAATTC    | GCACTACAAATGTGAGGGAA    |
| RANKL G  | TGCTGTCTTCCCGATGTTCC    | TTGTACACGAGGGTGATGC     |
| RANKL H  | GAGTTTGCAGGCAGGTGTTG    | CCCCTGTAGCTGCAATCCAA    |
| NC       | GTGGCTGCTCTTCGCTGCCA    | TGCTGCCACCTGGCCTTTGG    |
| PC       | ATTGGGCCTCATCACTTGGG    | GGTCTCTCTCGGAGTCAGGT    |



Khalid, et al., Supplemental Table 2

Mouse mRNA primers

| SEQUENCE       | FORWARD PRIMER 5' TO 3' | REVERSE PRIMER 5' TO 3' |
|----------------|-------------------------|-------------------------|
| <b>β-ACTIN</b> | AGCCATGTACGTAGCCATCC    | CTCTCAGCTGTGGTGGTGAA    |
| <b>RANKL</b>   | AGCCGAGACTACGGCAAGTA    | GCGCTCGAAAGTACAGGAAC    |
| <b>OPG</b>     | GTCCTGCACAGCTTCACAA     | AAACAGCCCAGTGACCATTC    |
| <b>RUNX2</b>   | CACGGTGACTCCCCTTACTT    | ATACGTGTGACCCAGTGCAA    |
| <b>BMP4</b>    | GCGGGACTTCGAGGCGACAC    | CGGGACGCTCCGGTACTCA     |
| <b>BMP6</b>    | GCGGTGACGGCTGCTGAGTT    | GCACGGGGTTGACGTGGAG     |
| <b>BMPR1A</b>  | CACCGAAAGCCCAGCTACGCA   | GGGGCAGTGTAGGCTGCAA     |
| <b>TGFB1</b>   | AGGGCTACCATGCCAACTTC    | CCACGTAGTAGACGATGGGC    |
| <b>TGFB2</b>   | CTGCCTTCGCCCTCTTTACA    | CCCCAGCACAGAAGTTAGCA    |
| <b>TGFB3</b>   | ATGACCCACGTCCCCTATCA    | ACTCAGACTCCGAGGTCTCC    |
